# Regulation of Insulin and Leptin Signaling by Muscle Suppressor of Cytokine Signaling 3 (SOCS3)

Zhenggang Yang<sup>1,2</sup>, Matthew Hulver<sup>3</sup>, Ryan P. McMillan<sup>3</sup>, Lingzhi Cai<sup>4</sup>, Erin E. Kershaw<sup>4</sup>, Liqing Yu<sup>5</sup>, Bingzhong Xue<sup>1,6\*</sup>, Hang Shi<sup>1,6\*</sup>

**1** Department of Internal Medicine, Wake Forest University School of Medicine, Winston-Salem, North Carolina, United States of America, **2** State Key Laboratory of Infectious Disease Diagnosis and Treatment, First Affiliated Hospital of Zhejiang University, Hang Zhou, China, **3** Department of Human Nutrition, Foods, and Exercise, Virginia Polytechnic Institute and State University, Blacksburg, Virginia, United States of America, **4** Division of Endocrinology, Diabetes, and Metabolism, University of Pittsburgh, Pittsburgh, Pennsylvania, United States of America, **5** Department of Animal and Avian Sciences, University of Maryland, College Park, Maryland, United States of America, **6** Department of Biology, Georgia State University, Atlanta, Georgia, United States of America

## Abstract

Skeletal muscle resistance to the key metabolic hormones, leptin and insulin, is an early defect in obesity. Suppressor of cytokine signaling 3 (SOCS3) is a major negative regulator of both leptin and insulin signaling, thereby implicating SOCS3 in the pathogenesis of obesity and associated metabolic abnormalities. Here, we demonstrate that SOCS3 mRNA expression is increased in murine skeletal muscle in the setting of diet-induced and genetic obesity, inflammation, and hyperlipidemia. To further evaluate the contribution of muscle SOCS3 to leptin and insulin resistance in obesity, we generated transgenic mice with muscle-specific overexpression of SOCS3 (MCK/SOCS3 mice). Despite similar body weight, MCK/SOCS3 mice develop impaired systemic and muscle-specific glucose homeostasis and insulin action based on glucose and insulin tolerance tests, hyperinsulinemic-euglycemic clamps, and insulin signaling studies. With regards to leptin action, MCK/SOCS3 mice exhibit suppressed basal and leptin-stimulated activity and phosphorylation of alpha2 AMP-activated protein kinase ( $\alpha$ 2AMPK) and its downstream target, acetyl-CoA carboxylase (ACC). Muscle SOCS3 overexpression also suppresses leptin-regulated genes involved in fatty acid oxidation and mitochondrial function. These studies demonstrate that SOCS3 within skeletal muscle is a critical regulator of leptin and insulin action and that increased SOCS3 may mediate insulin and leptin resistance in obesity.

**Citation:** Yang Z, Hulver M, McMillan RP, Cai L, Kershaw EE, et al. (2012) Regulation of Insulin and Leptin Signaling by Muscle Suppressor of Cytokine Signaling 3 (SOCS3). *PLoS ONE* 7(10): e47493. doi:10.1371/journal.pone.0047493

**Editor:** Thierry Alquier, CRCHUM-Montreal Diabetes Research Center, Canada

**Received:** March 19, 2012; **Accepted:** September 17, 2012; **Published:** October 24, 2012

**Copyright:** © 2012 Yang et al. This is an open-access article distributed under the terms of the Creative Commons Attribution License, which permits unrestricted use, distribution, and reproduction in any medium, provided the original author and source are credited.

**Funding:** This work was supported by National Institute of Health (NIH) grants R01DK084172, American Heart Association (AHA) Mid-Atlantic Affiliate Grant-in-Aid 11GRNT7370080 and P30 AG21332 (to HS), NIH grant R01HL107500 and AHA Scientist Development Grant 10SDG3900046 (to BX). The funders had no role in study design, data collection and analysis, decision to publish, or preparation of the manuscript.

**Competing Interests:** The authors have declared that no competing interests exist.

\* E-mail: hshi3@gsu.edu (HS); bxue@gsu.edu (BX)

## Introduction

Obesity, a disorder of impaired energy metabolism, is highly associated with insulin resistance and overt type 2 diabetes mellitus [1]. There is considerable evidence that energy balance and glucose homeostasis are physiologically regulated by the key metabolic hormones leptin and insulin, whose signaling network and ultimate action are interconnected in multiple tissues [1]. In addition, the development of resistance to the action of both leptin and insulin, which can occur with age, obesity and inflammation, appears to have a prime role in the pathogenesis of obesity, type 2 diabetes, and other metabolic disorders.

Skeletal muscle is a key metabolic tissue for insulin-stimulated glucose disposal and for energy metabolism. It represents about 40% of total body mass in nonobese subjects, and accounts for up to 30% of resting metabolic rate [2]. Skeletal muscle is a critical contributor to insulin resistance and obesity. Multiple studies have demonstrated that skeletal muscle-specific defects in insulin signaling contribute to systemic metabolic phenotypes [3,4,5]. While substantially less is known about the effects of leptin action in skeletal muscle, leptin has been shown to regulate lipid metabolism through direct activation of AMP-activated protein kinase (AMPK) [6,7] in this tissue. The ability of leptin to stimulate

muscle AMPK is significantly impaired in high fat diet-challenged mice, suggesting muscle leptin resistance in obesity [8]. Thus, insulin and/or leptin resistance in skeletal muscle may play a significant role in the pathogenesis of obesity and type 2 diabetes. Nevertheless, the cellular mechanisms linking insulin and leptin resistance in skeletal muscle remain poorly understood.

Suppressor of cytokine signaling 3 (SOCS3) is one of the SOCS protein family members, each of which contains a central SH2 domain and a conserved C-terminal SOCS box [1]. The SOCS proteins are rapidly induced by cytokines, and act as negative feedback regulators of cytokine signaling through several mechanisms, including direct binding to tyrosine-phosphorylated JAK or cytokine receptors and proteasomal degradation of signaling proteins via a SOCS box-mediated ubiquitination complex [1]. Previous work has established SOCS3 as a negative regulator of leptin signaling in hypothalamus [9,10]. Leptin induces SOCS3, which in turn inhibits leptin signaling [9,10], suggesting that SOCS3 plays a role in regulating leptin sensitivity. Previous studies have also shown that SOCS3 is a negative regulator of insulin signaling in fat and liver [11,12,13,14]. Taken together, accumulating evidence strongly suggests that a single molecule, suppressor of cytokine signaling 3 (SOCS3), may mediate both leptin and

insulin resistance due to its ability to inhibit leptin and insulin signaling in both central and peripheral target tissues [9,10,11,12,13]. However, the role of SOCS3 in skeletal muscle, a key tissue contributing to obesity and insulin resistance, is not known. We hypothesize that skeletal muscle SOCS3 contributes to obesity and insulin resistance by antagonizing leptin and insulin signaling. To test this hypothesis, we characterized muscle SOCS3 expression in response to metabolic challenges known to be associated with insulin and/or leptin resistance such as high-fat diet feeding, genetic obesity, lipid infusion, and TNF $\alpha$  injection. We then determine the metabolic consequences of transgenic overexpression of SOCS3 exclusively in skeletal muscle of mice, including evaluation of leptin and insulin signaling pathways.

## Results

### SOCS3 Expression is Elevated in Skeletal Muscle of Mice with Obesity, Inflammation and Hyperlipidemia

Evaluation of SOCS3 mRNA expression in murine skeletal gastrocnemius muscle under conditions known to be associated with insulin resistance revealed that SOCS3 expression was increased by high-fat diet-induced obesity (DIO) (Fig. 1A), genetic obesity due to leptin deficiency (*ob/ob*) mice (Fig. 1B), and inflammation due to injection with the pro-inflammatory cytokine TNF $\alpha$  (Fig. 1C) and hyperlipidemia due to lipid infusion (Fig. 1D) [15,16]. Similar increase, albeit to a lesser extent, was also observed in soleus of DIO and *ob/ob* mice (Figure S1). In addition, over-expressing SOCS3 in C2C12 myotubes suppressed insulin-stimulated glucose uptake (Fig. 1E). These data suggest that skeletal muscle SOCS3 is increased in conditions associated with obesity and insulin resistance, and may be an important molecule mediating obesity-, lipid-, and cytokine-induced insulin resistance.

### Creation of Transgenic Mice Over-expressing SOCS3 in Skeletal Muscle

To determine whether up-regulation of muscle SOCS3 expression contributes to the development of obesity and insulin resistance, we generated a transgenic murine model for over-expressing SOCS3 in tissue specific manner. The SOCS3 construct is shown in Fig. 2A and is described in Material and Methods and references [17,18,19]. By PCR genotyping of LacZ transgene and Xgal staining, we identified 32 transgenic founders, two of which showed increased SOCS3 expression in skeletal

muscle after crossing with the MCK-Cre mouse expressing Cre recombinase specifically in muscle under the control of the MCK promoter [20]. The line 8 mice, when crossed with MCK Cre mice, had a 20–30 fold increase of SOCS3 mRNA in all types of muscle (eg, gastrocnemius (Gas), soleus (Sol), extensor digitorum longus (EDL) and tibialis anterior (TA)), designated as the MCK/SOCS3 mice, compared with the control SOCS3 mice without the presence of the MCK Cre (designated as control mice) (Fig. 2B), whereas no differences in SOCS3 expression have been detected in other tissues including hypothalamus, fat, liver, pancreas, kidney and spleen etc. (data not shown). In addition, we also detected the expression of the transgene protein by immunoblotting eGFP and HA tag with specific antibodies (Fig. 2C). Thus, MCK/SOCS3 mice have increased SOCS3 mRNA and protein expression exclusively in skeletal muscle.

### Over-expression of SOCS3 Blocks Insulin Signaling in Skeletal Muscle

To determine the effect of muscle-specific SOCS3 overexpression on overall energy homeostasis, we determine body weight in response to low fat (LF) or high fat (HF) feeding. MCK/SOCS3 mice and control mice displayed similar body weights (Figure S2A). There was no difference in food intake between MCK/SOCS3 and control mice (Figure S2B).

Previous data have established that SOCS3 is a negative regulator of insulin signaling in fat and liver [11,12,13,14]. However, the role of SOCS3 in regulating muscle insulin signaling is not known. We therefore examined muscle insulin signaling in MCK/SOCS3 and control mice fed a chow diet. Since IRS-1 is the major signaling protein that SOCS3 targets to inhibit insulin signaling [12,13], we first measured insulin-stimulated IRS-1 phosphorylation. As shown in Fig. 3A and 3B, insulin injection markedly stimulated the overall tyrosine and specific tyrosine (Tyr612) phosphorylation of insulin receptor substrate 1 (IRS-1) in gastrocnemius muscle of control mice, while this signaling event was attenuated in MCK/SOCS3 mice. p85 is a regulatory subunit of PI 3-kinase, and p85 docking to IRS proteins is essential for regulation of PI-3 kinase activity. We therefore evaluated the docking of p85 to IRS-1 in the skeletal muscle of MCK/SOCS3 and control mice. IRS-1 was immunoprecipitated, followed by immunoblotting with the p85 antibody. Fig. 3A shows that insulin-stimulated association of p85 with IRS-1 was reduced in MCK/SOCS3 mice, suggesting an attenuation of PI-3 kinase activity by muscle SOCS3 over-

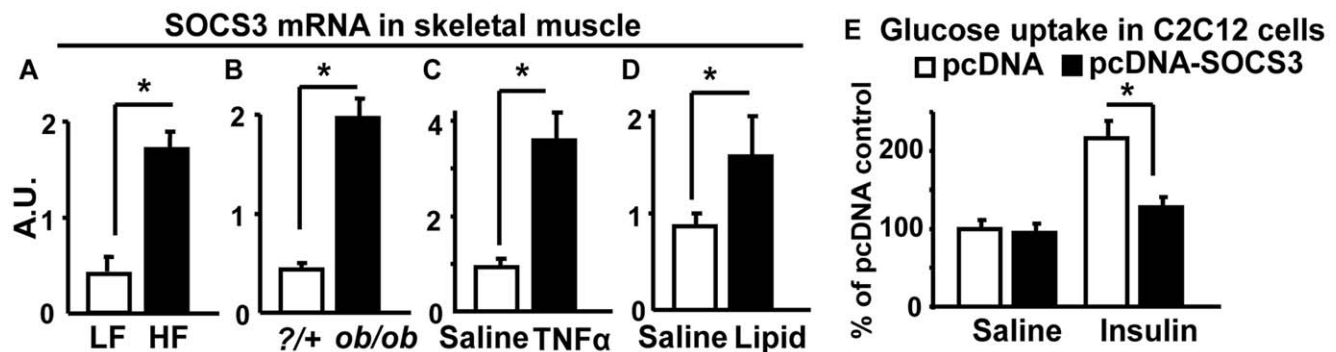

**Figure 1. SOCS3 mRNA is elevated in skeletal muscle of diet-induced obese (A), *ob/ob* (B), TNF $\alpha$ -injected (C) and lipid-infused (D) mice.** Total RNA was isolated from gastrocnemius and SOCS3 RNA levels were measured by quantitative real-time RT-PCR. (E). Over-expressing SOCS3 in C2C12 myotubes inhibits insulin-stimulated glucose uptake. C2C12 myotubes were treated with or without 100 nM insulin for 20 min. Data are expressed as mean  $\pm$  SE, n=6–8. \*p<0.05. A.U.: arbitrary units. doi:10.1371/journal.pone.0047493.g001

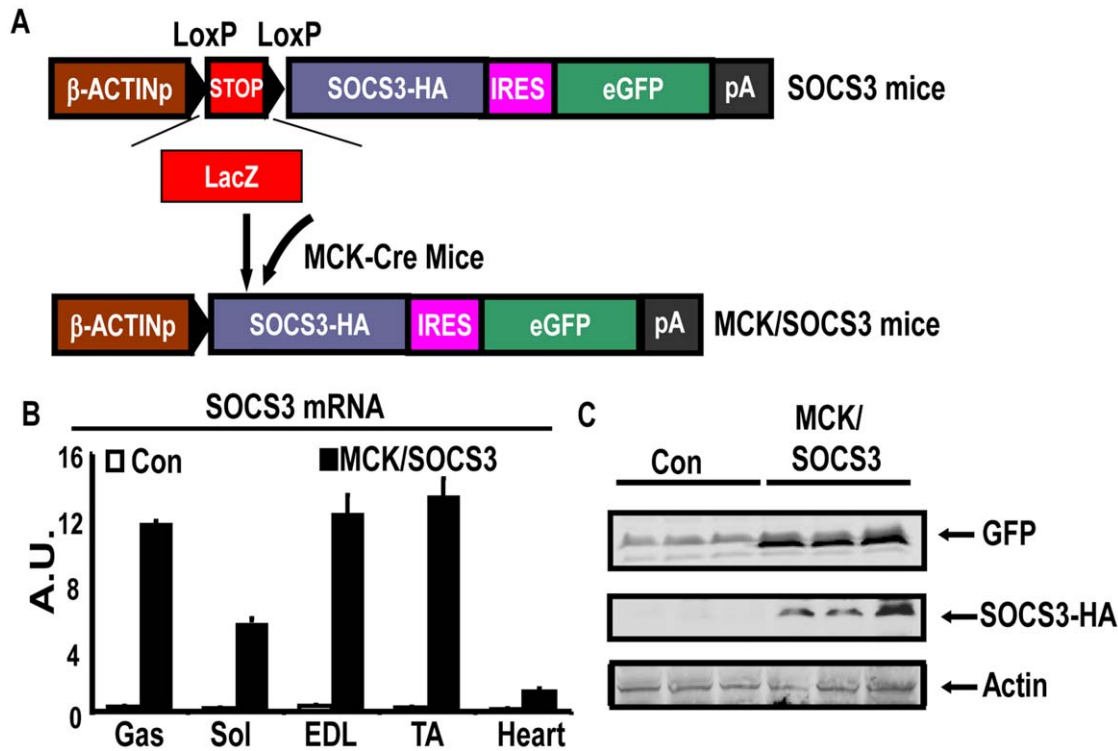

**Figure 2. Creation of transgenic mice overexpressing SOCS3 in skeletal muscle.** (A) The SOCS3 transgene construct. Transgenic mice (SOCS3) were crossed with MCK-Cre mice to generate mice over-expressing SOCS3 specifically in skeletal muscle (SOCS3/MCK). (B) SOCS3 mRNA is increased in SOCS3/MCK mice compared to SOCS3 mice. SOCS3 mRNA in various types of skeletal muscle was measured by real-time RT PCR. Gas: gastrocnemius; Sol: soleus; EDL: extensor digitorum longus; TA: tibialis anterior.  $n=4$ . (C) The tag protein GFP and the transgene-encoded protein SOCS3-HA are expressed in gastrocnemius skeletal muscle. The proteins were detected by immunoblotting using specific antibodies. doi:10.1371/journal.pone.0047493.g002

expression. Similar results were observed on the effect of SOCS3 over-expression on Akt phosphorylation (Fig. 3C). These data suggest that SOCS3 over-expression impairs local insulin signaling in skeletal muscle.

#### Muscle SOCS3 Over-expression Causes Systemic Insulin Resistance

To determine whether impaired muscle insulin signaling caused by SOCS3 over-expression can be translated into systemic insulin resistance, we characterized the whole body insulin sensitivity of MCKSOCS3 mice fed a chow diet. Although there was no difference in fed glucose levels between control and MCK/SOCS3 mice, MCK/SOCS3 mice had higher fed insulin levels, suggesting that MCK/SOCS3 mice exhibited insulin resistance (Fig. 4A). To further confirm this finding, we performed ITTs and GTTs on MCK/SOCS3 and control mice. MCK/SOCS3 mice showed a lesser hypoglycemic response to intraperitoneal injection of insulin, compared with control mice (Fig. 4B). Likewise, MCK/SOCS3 mice were also more glucose intolerant in GTTs. In addition, we performed hyperinsulinemic-euglycemic clamp studies to examine the insulin sensitivity of glucose metabolism in MCK/SOCS3 and control mice. During a continuous insulin infusion at 2.5 mU/kg/min, the plasma insulin levels were increased to over 500 pM, and plasma glucose levels were maintained at ~7 mM in both genotypes of mice (Table S1). The glucose infusion rate required to maintain euglycemia was reduced by 38% in MCK/SOCS3 mice compared with control mice (Fig. 4C). Similarly, insulin-stimulated glucose turnover was decreased by 27% in MCK/SOCS3 mice (Fig. 4C). Although

there was a trend of increased hepatic glucose production in MCK/SOCS3 mice during the clamp stage, it did not reach statistical significance (Fig. 4C). Consistent with the measures of whole-body glucose turnover, MCK/SOCS3 mice displayed a 37% decrease in insulin-stimulated glucose uptake in gastrocnemius muscle, and to a lesser extent, a 13% decrease in soleus muscle, while there was no change in glucose uptake in epididymal fat between two genotypes (Fig. 4C). These data suggest that over-expression of SOCS3 in skeletal muscle causes systemic and tissue-specific insulin resistance.

#### Skeletal Muscle Overexpression of SOCS3 Suppresses Basal AMPK Signaling

To determine the role of SOCS3 in regulation of leptin signaling in skeletal muscle, we examined the muscle AMPK pathway, a key cellular signal activated by leptin [21]. Fig. 5A shows that  $\alpha 2$ AMPK activity in soleus and EDL muscle of MCK/SOCS3 was decreased by 35%, compared with that of control mice. Consistent with these findings, AMPK phosphorylation was down-regulated in soleus, EDL and gastrocnemius muscle of SOCS3/SOCS3 mice (Fig. 5B). In addition, the phosphorylation of ACC, downstream target of AMPK and important regulator of fatty acid oxidation, was also decreased (Fig. 5B). These results were confirmed by quantitation of these blots (Figure S3). These data strongly suggest an inhibitory effect of SOCS3 on basal AMPK-ACC signaling pathway. Activation of AMPK results in up-regulation of genes involved in fatty acid oxidation and mitochondrial function. We determined whether SOCS3 over-expression antagonizes this action in

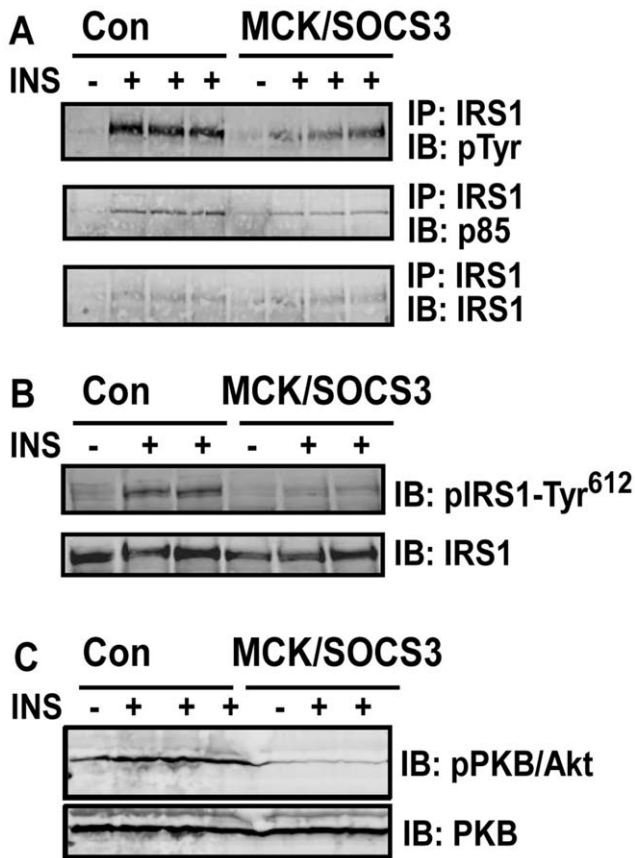

**Figure 3. Skeletal muscle SOCS3 over-expression blocks insulin signaling in skeletal muscle.** 5-month old mice on chow diet were intraperitoneally injected with 10 units/kg body weight of human insulin or saline. 10 min after injection, gastrocnemius muscle strips were dissected and saved for immunoprecipitation and immunoblotting analysis of insulin signaling molecules as described in Materials and Methods.

doi:10.1371/journal.pone.0047493.g003

skeletal muscle of transgenic mice. We found that SOCS3 over-expression decreased mRNA expression of such genes, including carnitine palmitoyl transferase 1 (CPT1), PPAR $\alpha$ , cytochrome C oxidase I (COXI), and acyl-CoA oxidase (ACOX), in soleus muscle (**Fig. 5C**). In parallel, the activity of  $\beta$ -hydroxyacyl-CoA dehydrogenase (HADA), an enzyme involved in fatty acid oxidation, was decreased by 25% in MCK/SOCS3 mice (**Fig. 5D**). Consistent with this, the activity of citrate synthase (CS), a mitochondrial enzyme, was decreased by 20% in these transgenic mice, suggesting a suppression of mitochondrial enzymatic activity (**Fig. 5E**). We also examined the muscle mitochondrial content by measuring mitochondrial DNA-encoded gene COXI, an index that has been used to determine mitochondrial content in our previous publications [22,23]. We found that the COXI DNA amount was decreased by 40% in soleus muscle of MCK/SOCS3 mice (**Fig. 5F**), suggesting a decrease in muscle mitochondrial content. Despite these observations, we were unable to detect a difference in muscle morphology or intramyocellular neutral lipid content under these conditions using histological methods (**Figure S4**). Thus, this SOCS3-mediated reduction in AMPK action may not be sufficient to impair overall intramyocellular lipid homeostasis perhaps due to compensatory mechanisms.

### Skeletal Muscle Overexpression of SOCS3 Blocks Leptin Activation of AMPK Signaling

Since leptin can directly activate AMPK signaling in skeletal muscle [6,7], we examined leptin-activated AMPK signaling in skeletal muscle of MCK/SOCS3 mice with muscle SOCS3 over-expression. In EDL muscle, Leptin injection for 30 min stimulated  $\alpha$ 2AMPK activity by 50% in control SOCS3 mice, while this stimulation was completely blocked in MCK/SOCS3 mice (**Fig. 6A** left). Similar results were observed in leptin-induced phosphorylation of AMPK at Thr172. Leptin injection resulted in phosphorylation of AMPK Thr172 in EDL of control mice, but not MCK/SOCS3 mice (**Fig. 6A** right). Consistent with these findings, leptin-induced phosphorylation of ACC was also attenuated in EDL of SOCS3/MCK mice, compared with control mice (**Fig. 6A** right). We further examined leptin-activated AMPK signaling in soleus muscle. SOCS3 over-expression in soleus exerted a similar inhibitory effect on both basal and leptin-stimulated AMPK signaling, although leptin's ability to activate AMPK pathway was less potent in soleus compared with EDL (**Fig. 6B**). These data suggest that SOCS3 overexpression in muscle impairs leptin-mediated activation of  $\alpha$ 2AMPK and its downstream targets.

### Discussion

SOCS3 is best known for its negative regulation of leptin signaling and action in hypothalamus [9,10,24]. We and others have also shown that SOCS3 is a negative regulator of insulin signaling in fat and liver [11,12,13,14]. Therefore, SOCS3 is a single molecule that mediates both leptin and insulin resistance due to its ability to down-regulate leptin and insulin signaling. These data are the first to demonstrate that SOCS3 antagonizes both leptin and insulin signaling in skeletal muscle, which is a principal site of glucose and fatty acid use and is one of the primary tissues responsible for insulin resistance in obesity [5]. Muscle SOCS3 is therefore positioned to play an important role in the pathogenesis of obesity-induced insulin resistance and type 2 diabetes by antagonizing both leptin and insulin signaling in skeletal muscle.

Skeletal muscle is the primary site of insulin-dependent glucose disposal and resistance of skeletal muscle to insulin's action is an early step in the development of type 2 diabetes [3,4,5]. Despite the pivotal role of skeletal muscle in the development of systemic insulin resistance, the molecular mechanisms underlying skeletal muscle insulin resistance in the setting of obesity still remain elusive. Our study suggests that SOCS3 within skeletal muscle is a critical factor in the development of both skeletal muscle-specific and systemic insulin resistance in response to obesity. MCK/SOCS3 mice develop impaired systemic and muscle-specific glucose homeostasis and insulin action evident in glucose and insulin tolerance tests, hyperinsulinemic-euglycemic clamps, and insulin signaling studies. Although the MCK/SOCS3 mice showed normal glycemia on regular low fat diets, they did exhibit hyperinsulinemia. Given the fact that these mice are normoglycemic despite insulin resistance, we speculate that they have higher insulin levels due to compensatory secretion of insulin from pancreas, similar to liver insulin receptor knockout (LIRKO) mice [25]. We previously generated a transgenic model over-expressing SOCS3 in adipose tissue. Although over-expression of SOCS3 in adipose tissue causes local insulin resistance, it is not sufficient to cause systemic insulin resistance, maybe due to the limited contribution of adipose tissue in whole-body glucose disposal. In contrast, our current genetic model with muscle SOCS3 over-

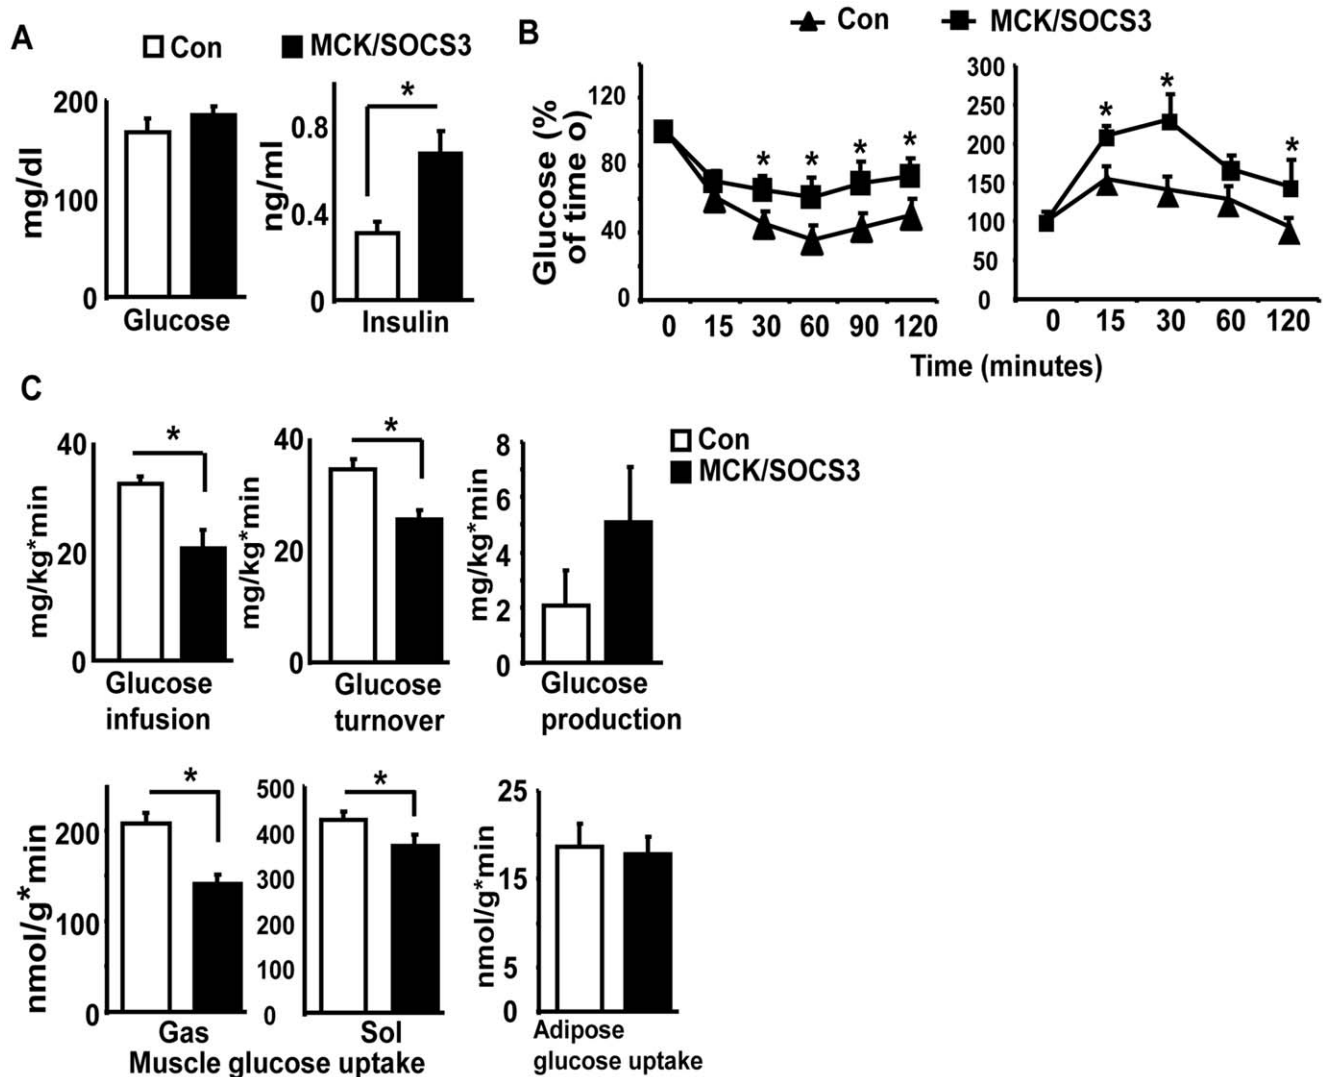

**Figure 4. Skeletal muscle SOCS3 over-expression impairs systemic insulin sensitivity.** (A) Blood glucose levels (left panel) and blood insulin levels (right panel) in MCK/SOCS3 and control mice fed a low fat chow diet. (B): ITTs (left) and GTTs (right) in MCK/SOCS3 and control mice. ITTs and GTTs were performed on mice fed a chow diet as described in Materials and Methods. (C) Glucose infusion rate, insulin-stimulated glucose turnover, hepatic glucose production under clamp, and insulin-stimulated glucose uptake in gastrocnemius/soleus muscle and epididymal fat. Hyperinsulinemic-euglycemic clamps were conducted in MCK/SOCS3 and control mice fed a chow diet as described in Materials and Methods. Data are expressed as mean  $\pm$  SE;  $n=5$ , \* $p<0.05$  vs. control SOCS3 mice. doi:10.1371/journal.pone.0047493.g004

expression demonstrates a prominent role for muscle SOCS3 in the development of systemic insulin resistance in obesity.

It has been demonstrated that SOCS3 negatively regulates insulin signaling in adipose tissue and liver [13,14,26] via several mechanisms, including binding to the IR at phosphorylated tyrosine 960 [27], inhibition of IRS-1 and IRS-2 tyrosine phosphorylation [14], proteosomal degradation of SOCS-associated protein (e.g. IRS-1) [12], and inhibition of Jak [27]. In this genetic model, SOCS3 appears to mainly antagonize IRS-1 phosphorylation. It is noteworthy that, in addition to the direct inhibition of SOCS3 on IRS-1 phosphorylation, other mechanisms might be involved in the development and complexity of the insulin resistant phenotype in our genetic model. Since activation of AMPK increases basal and insulin-stimulated glucose uptake in skeletal muscle [28], SOCS3 may affect insulin signaling indirectly by antagonizing muscle AMPK signaling.

Although leptin is best known for its regulation of food intake and energy homeostasis via actions through neurons in the hypothalamus [29], increasing evidences demonstrate that leptin directly regulates lipid metabolism in extra-neural tissues, notably, skeletal muscle [30,31]. Adenoviral-mediated leptin gene transfer in rats results in rapid depletion of triacylglycerol in tissues including skeletal muscle [32,33], which is exerted at least in part via direct action of leptin in peripheral tissues [34]. Skeletal muscle expresses the long-form leptin receptor [35], and leptin directly activates lipid metabolism in skeletal muscle isolated from mice, humans, rats and C2C12 myotubes [6,7,36,37,38,39,40]. In addition, recent data show that leptin's direct effects on skeletal muscle is mediated by activation of the AMPK signaling pathway [6,7], which may involve up-regulation of genes responsible for fatty acid oxidation, such as peroxisome proliferator-activated receptor  $\alpha$  (PPAR $\alpha$ ) [7]. However, the ability of leptin to stimulate muscle AMPK is significantly impaired in high fat diet-challenged

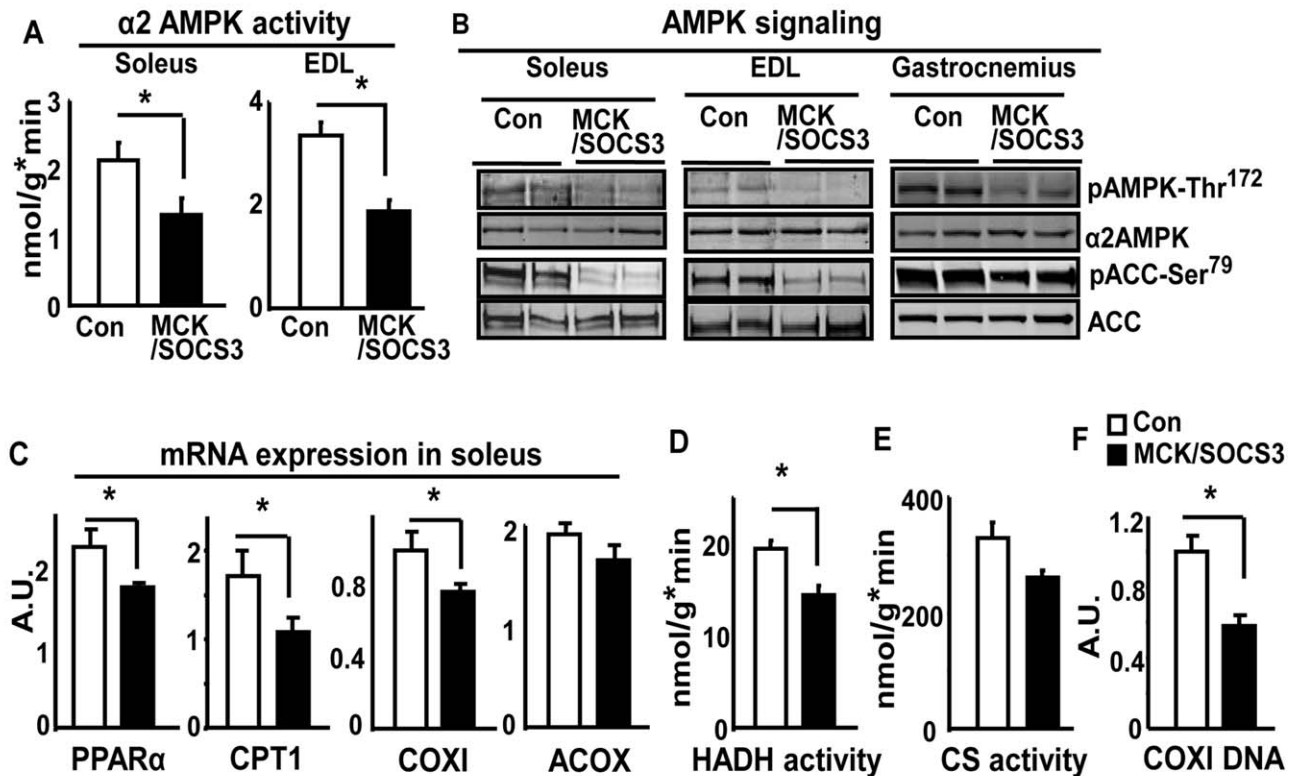

**Figure 5. Mice with skeletal muscle over-expression of SOCS3 have suppressed basal AMPK signaling.** (A)  $\alpha 2$ AMPK activity, (B) AMPK signaling, (C) expression of genes involved in fatty acid oxidation, (D)  $\beta$ -hydroxyacyl-CoA dehydrogenase activity (HADH), (E) citrate synthase activity (CS), and (F) COXI DNA content in skeletal muscle of SOCS3/MCK and control mice on a chow diet. Soleus, EDL or gastrocnemius muscles from 5-month-old chow-fed male mice were evaluated for AMPK activity using an immune complex assay. Phosphorylation and total protein levels of AMPK and ACC were measured by immunoblotting. Gene expression was measured by Real-time RT-PCR and corrected with cyclophilin levels. HADA and CS activities were determined spectrophotometrically using skeletal muscle (gastrocnemius) homogenates. Mitochondrial DNA content was measured in muscle (gastrocnemius) DNA samples by Real-time PCR using primer/probe sets corresponding to mitochondrial DNA-encoded cytochrome c oxidase subunit I (COXI) gene and normalized with nuclear DNA-encoded gene UCP2. Data are expressed as Mean  $\pm$  SE, n=6–8. \* $p < 0.05$  vs. control SOCS3 mice in (A), (C), (D), and (F);  $p = 0.05$  vs. control SOCS3 mice in (E). doi:10.1371/journal.pone.0047493.g005

mice, suggesting an early sign of leptin resistance [8]. Moreover, leptin stimulation of muscle fatty acid oxidation is significantly suppressed in obese humans and rodents [38,39], which occurs as early as 4 weeks after high fat diet feeding [38]. These observations suggest that skeletal muscle leptin resistance, similar to central leptin resistance, is an early defect of, and may thereby play an important role in obesity and insulin resistance. Therefore, skeletal muscle leptin signaling, which may be mediated at least in part through direct activation of AMPK signaling, may be an important regulator of muscle lipid metabolism and resistance to leptin's action in skeletal muscle may contribute to the development of obesity and insulin resistance. One prominent question is what signal(s) mediates muscle leptin resistance. Strong evidence from our current study points to SOCS3.

The roles of SOCS3 in antagonizing leptin's effects and determining leptin resistance in hypothalamus have been relatively well characterized. Recent data suggest that leptin rapidly induces SOCS3 expression in L6 rat skeletal muscle cells [41]. In addition, skeletal muscle leptin resistance appears to be associated with increased expression of SOCS3, and over-expressing SOCS3 in primary human myotubes significantly inhibits leptin's direct effect on AMPK-ACC signaling [42]. These data suggest that skeletal muscle SOCS3 may also be an important determinant of leptin resistance. Our study using more compelling genetic approaches

demonstrates that skeletal muscle SOCS3 is a negative regulator of basal and leptin-activated  $\alpha 2$ AMPK signaling and downstream targets. We also observed a trend of increase of circulating leptin levels in transgenic mice with muscle SOCS3 over-expression (data not shown), similar to the scenario of insulin resistance where there is a compensatory increase of circulating insulin levels due to impaired insulin signaling in insulin sensitive tissues. Therefore, skeletal muscle SOCS3 may serve as a mediator of muscle leptin resistance. One limitation of our present study is that we did not measure  $\alpha 1$ AMPK activity and phosphorylation at either basal or leptin stimulated levels in our genetic model. Although  $\alpha 2$ AMPK is the major isoform that appears to be regulated by leptin signaling in skeletal muscle [6],  $\alpha 1$ AMPK can also be regulated in skeletal muscle in various physiological conditions [43]. Therefore, we can not rule out that  $\alpha 1$ AMPK may also be affected by SOCS3 expression and contribute to the metabolic phenotypes observed in our genetic mouse. Moreover, additional studies are required to address the molecular mechanisms whereby SOCS3 antagonizes AMPK signaling.

In summary, we demonstrate that muscle-specific over-expression of SOCS3 impairs muscle insulin signaling and promotes systemic insulin resistance. Furthermore, muscle-specific over-expression of SOCS3 suppresses the basal AMPK pathway and blocks the effect of leptin on AMPK activation. Thus, muscle-

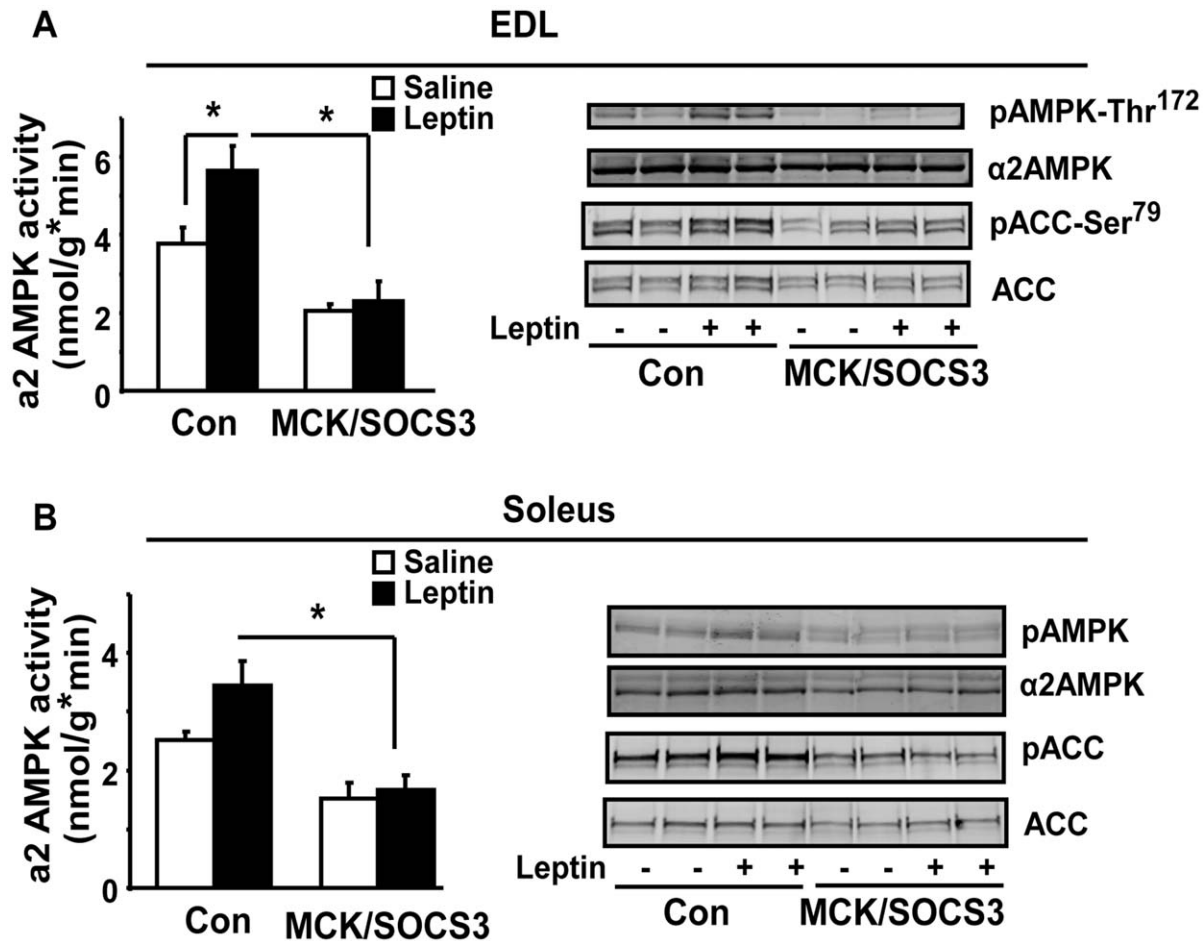

**Figure 6. Skeletal muscle SOCS3 over-expression blocks leptin-activated AMPK signaling in EDL (A) and soleus (B) muscle.** 5-month old mice on chow diet were intraperitoneally injected with leptin (3 mg/kg body weight) and euthanized 30 minutes later. Soleus and EDL muscle strips were quickly removed and frozen in liquid nitrogen.  $\alpha 2$ AMPK activity and AMPK and ACC phosphorylation were conducted as described in Figure 3. Data are expressed as Mean  $\pm$  SE,  $n=6-8$ . \* $p<0.05$ . doi:10.1371/journal.pone.0047493.g006

specific overexpression of SOCS3 is sufficient to negatively regulate both insulin and leptin action in skeletal muscle. These findings, in combination with early impairment in these pathways and increased SOCS3 expression in muscle in obesity-associated metabolic states, strongly support a role for SOCS3 in the pathogenesis of these disorders.

## Materials and Methods

### Animals

The murine SOCS3 cDNA with a 3' sequence encoding two HA tags was isolated from pcDNA 3.0 SOCS3 expression vector [9], blunt-ended and ligated into the Xho I site of the pCCALL2-IRES-EGFP vector previously used for transgene constructs described in references [17,18,19] (obtained through Dr. Brad Lowell's lab, Beth Israel Deaconess Medical Center, Boston). Key features of the construct include the following: 1) a chicken  $\beta$ -actin promoter allowing ubiquitous expression of cDNA construct placed behind it; 2) a loxP-flxed transcriptional blocker that contains the *lacZ* gene, 3) coding sequence for SOCS3 with HA-tag, followed by ires-eGFP (internal ribosomal entry site-enhanced green fluorescent protein). With this design, the  $\beta$ -actin promoter can only drive SOCS3 expression when the transcriptional block is removed in the presence of Cre, therefore achieving tissue-specific

over-expression. The SOCS3 construct was linearized with Stu I and injected into pronuclei of fertilized eggs from FVB mice in the Transgenic Core Facility at Beth Israel Deaconess Medical Center, Boston. 32 positive transgenic founders were obtained based on both PCR genotyping of LacZ transgene (Forward primer: 5'-gagctctcgttgctgcataa-3'; Reverse primer: 5'-cagcagcagcagcatttcaa-3') and Xgal staining. After crossing with the MCK-Cre mouse expressing Cre recombinase specifically in muscle under the control of the muscle creatine kinase (MCK) promoter (Jackson Laboratory, Bar Harbor, ME), two independent lines exhibited increased SOCS3 expression in skeletal muscle and the line (line 8) with higher expression was used for further characterization and designated as MCK/SOCS3 mice.

The animal studies were approved by the institutional animal care and use committee of the Baptist Medical Center at Wake Forest University. SOCS3 mice were crossed with MCK-Cre mice to generate mice over-expressing SOCS3 in skeletal muscle (designated as SOCS3/MCK mice). The offsprings were screened by both PCR genotyping and Xgal staining. In the high-fat (HF) diet study, 5-week old SOCS3 mice and SOCS3/MCK mice were placed on either a low fat (LF) (Research Diets D12450B, 10% calories from fat, Research Diets Inc., New Brunswick, NJ) or a high fat (HF) diet (Research Diets D12492, 60% calories from fat, Research Diets Inc.) for 24 weeks. Body weight was measured



weekly. Blood glucose was measured with an OneTouch Ultra Glucose meter (Lifescan, Milpitas, CA). Serum insulin levels were measured using rat insulin enzyme-linked immunosorbent assay (ELISA) kits (Crystal Chem, Downers Grove, IL). Insulin tolerance tests (ITTs) were performed as previously described [44]. Mice were injected intraperitoneally (ip) with 1.2 unit/kg of human insulin (Humulin R, Eli Lilly, Indiana, IN) after a 6-hr fasting, and glucose levels were measured at different time points (0, 15, 30, 60, 120 minutes). For glucose tolerance tests (GTTs), mice were fasted overnight, and blood glucose was measured immediately before and 15, 30, 60, 120 minutes after ip injection of glucose (0.75 g/kg of body weight). After 24 weeks of LF/HF diet feeding, all mice were euthanized and blood was collected. Various fat pads (epididymal, subcutaneous, mesenteric and peri-renal) and skeletal muscles (gastrocnemius, soleus, extensor digitorum longus, and tibialis anterior) were dissected and frozen in liquid nitrogen and stored at  $-80^{\circ}\text{C}$ .

For the study of HF diet feeding on muscle SOCS3 expression, 6-week-old male C57BL/6J mice were purchased from the Jackson Laboratory (Bar Harbor, ME), and were fed LF chow or HF diets (D12331, fat content 58% by calorie, Research Diets Inc.) for 16 weeks. For lipid infusion studies, 3-month-old male C57BL/6J mice were implanted with indwelling catheters (Micro-Renathane tubing, MRE-025; Braintree Scientific Inc., Braintree, MA). After a 5-day recovery, mice were infused with lipids (5ml/kg/hr; Liposyn II; Abbott) and heparin (6 U/hr) or saline for 8 hrs with a microdialysis pump (CMA/102; CMA Microdialysis). For TNF $\alpha$  injection experiments, 2-month-old male mice were injected with TNF $\alpha$  (3.3  $\mu\text{g}$ ). 10-week-old ob/ob mice were purchased from the Jackson Laboratory. After the respective treatments (HF feeding, lipid infusion or TNF $\alpha$  injection), mice were euthanized, and skeletal muscles (gastrocnemius, soleus, and EDL) were dissected and frozen in liquid nitrogen.

### Cell Culture and Glucose Transport Assay

C2C12 myoblasts were purchased from ATCC and cultured in DMEM containing 10% of FBS. Cells were transfected with pcDNA 3.0 SOCS3 expression vector [9] using a SuperFect Transfection Reagent kit (Qiagen, Valencia, CA). Cells were grown to confluence and cultured in DMEM containing 2% of horse serum to induce differentiation into myotubes. For glucose transport assay, C2C12 myotubes were incubated in KRH buffer (129 mM NaCl, 4.8 mM KCl, 1.2 mM MgSO $_4$ , 1.8 mM CaCl $_2$ , and 20 mM HEPES, PH 7.4) with or without 100 nM insulin for 20 min. To start the glucose transport, 1  $\mu\text{Ci}$  of 2-Deoxy- $^3\text{H}$ -glucose with cold deoxy-glucose was added to each well and incubated for 10 min. To stop the transport, cells were rinsed with ice-cold KRH buffer for 3 times and lysed with 0.1% SDS. Cell lysates were added to scintillation vials with 5 ml scintillation liquid and counted.

### Immunoblotting and Immunoprecipitation

For immunoblotting, frozen muscle tissues were homogenized in a modified radioimmunoprecipitation assay (RIPA) lysis buffer containing 50 mM Tris-HCL, 1 mM EDTA, 1% NP-40, 0.25% sodium deoxycholate, 150 mM NaCl, 1 mM PMSF, 200  $\mu\text{M}$  Na $_3\text{VO}_3$ , 1% protease inhibitor cocktail (Sigma), and 1% phosphatase inhibitor cocktail (Sigma). Tissue homogenates were incubated on ice for 45 min to solubilize all proteins, and insoluble portions were removed by centrifugation at 14,000 g at  $4^{\circ}\text{C}$  for 15 min. Proteins from whole tissue lysates were separated by SDS-polyacrylamide gel electrophoresis (PAGE) and the gels were transferred to nitrocellulose membrane (Bio-Rad, Hercules, CA). The transferred membranes were blocked, washed, incubated with

various primary antibodies overnight at  $4^{\circ}\text{C}$ , and followed by fluorescence-conjugated secondary antibodies Alexa Fluor 680 (Invitrogen, Carlsbad, CA) at room temperature for 2 hrs. The blots were developed with a Li-COR Odyssey Infrared Imager system (Li-COR Biosciences). For immunoprecipitation, 1 mg of muscle lysate was incubated overnight with appropriate antibodies and protein A agarose (Santa Cruz) at  $4^{\circ}\text{C}$  with constant gentle shaking. Agarose beads were collected by centrifugation, washed with ice-cold RIPA lysis buffer 2 times and PBS 2 times, then boiled in 2X Laemmli sample buffer for denaturation of proteins. The immunoprecipitated protein was used for immunoblotting.

### In vivo Insulin and Leptin Signaling

For insulin signaling experiments, mice were intra-peritoneally injected with 10 U/kg body weight of human insulin (Humulin R, Eli Lilly Corp). Ten minutes after injection, gastrocnemius muscles were dissected and frozen in liquid nitrogen for analysis of the insulin signaling proteins as we described [44]. The site-specific phosphorylation (Tyr-612) of Insulin receptor substrate 1 (IRS-1) was measured by immunoblotting with the specific antibodies (Invitrogen). For the measurement of whole phosphorylation of IRS-1, muscle lysates were immunoprecipitated with IRS-1 (Upstate) antibodies, and followed by immunoblotting with phosphotyrosine 4G10 antibody (Upstate). PKB/Akt serine phosphorylation (Ser-473) was measured by immunoblotting with the specific antibody (Upstate). For leptin signaling experiments, mice were intraperitoneally injected with leptin (3 mg/kg body weight) and euthanized 30 minutes later. Gastrocnemius, Soleus and EDL muscles were quickly removed and frozen in liquid nitrogen. Phosphorylation of AMPK (Thr172) and its downstream target, acetyl CoA carboxylase (ACC-Ser79) was measured by immunoblot analysis using phospho-specific antibodies (Cell Signaling Technology, Beverly, MA).

### Hyperinsulinemic-euglycemic Clamps

Hyperinsulinemic-euglycemic clamp experiments were conducted as we previously described [15,45,46]. Mice were implanted with indwelling catheters (Micro-Renathane Tubing, MRE-025, Braintree Scientific Inc.) in the right jugular veins. After a 5-day recovery, mice were used for clamp experiments. Mice were fasted overnight (12 hours). After an initial 5  $\mu\text{Ci}$  bolus, [ $^3\text{H}$ ]-glucose (Perkin Elmer, Boston, MA) was infused at 0.05  $\mu\text{Ci}/\text{min}$  for 2 hours to measure basal glucose production during the basal stage. After the basal period, a two-hour hyperinsulinemic-euglycemic clamp was conducted with a primed and continuous infusion of human insulin (Humulin, Eli Lilly, Indianapolis, IN) at a rate of 2.5 mU/kg/min, coupled with a variable infusion of 40% glucose to maintain blood glucose concentrations at 6 mM. [ $^3\text{H}$ ]-glucose (10  $\mu\text{Ci}$  bolus, followed by 0.1  $\mu\text{Ci}/\text{min}$ ) was infused throughout the 2-hour clamp period. Blood glucose levels were monitored via tail bleed every 5 minutes in the 1<sup>st</sup> hour of clamp stage to achieve stable blood glucose levels and every 10 minutes until the end of the 2-hour clamp to maintain constant blood glucose levels. During the last 45 min before the end of clamp period, a bolus of 10  $\mu\text{Ci}$  2-deoxy-D-[1- $^{14}\text{C}$ ]-glucose (Perkin Elmer) was administered for measuring tissue specific glucose uptake. At the end of the experiments, mice were euthanized, and tissues were removed and immediately frozen in liquid nitrogen for analysis of 2-deoxy-D-[1- $^{14}\text{C}$ ]-glucose content. The rate of whole-body glucose turnover was estimated using a continuous infusion of [ $^3\text{H}$ ]-glucose at 0.1  $\mu\text{Ci}/\text{min}$ . Hepatic glucose production was calculated by subtracting glucose infusion rate from glucose turnover rate. Tissue-specific glucose uptake was calculated as previously described [45].



## Enzyme Activities

To measure isoform-specific activity of AMPK,  $\alpha 2$ AMPK was immunoprecipitated with the antibody (Santa Cruz, CA) specific to its  $\alpha 2$  catalytic subunit and protein-G. Kinase activity was determined using synthetic SAMS peptide [47]. Citrate synthase and  $\beta$ -hydroxyacyl-CoA activities were determined spectrophotometrically using skeletal muscle homogenates (20-fold dilution) prepared in 0.1 mol/l KH<sub>2</sub>PO<sub>4</sub>/Na<sub>2</sub>PHO<sub>4</sub> and 2 mmol/l EDTA, pH 7.2, as previously described [48].

## Total RNA Extraction and Quantitative RT-PCR

Total RNA was extracted using the Tri Reagent kit (Molecular Research Center, Cincinnati, OH), according to the manufacturer's protocol. The expression of genes of interest was assessed by quantitative RT-PCR (ABI Universal PCR Master Mix, Applied Biosystems, Foster City, CA) using a Stratagene Mx3000p thermocycler (Stratagene, La Jolla, CA), as we previously described [15]. The primer and probe pairs used in the assays were purchased from Applied Biosystems.

## Muscle Histology

Muscle histology and neutral lipid staining were performed as described [49]. Briefly, muscle was frozen in pre-chilled isopentane, placed in OCT, and cut into 10  $\mu$ m thick sections. Cryosections were stained with either hematoxylin and eosin for muscle morphology or with Oil Red O (ORO) for intramyocellular neutral lipid content. Images were visualized using a Leica microscope (DM4000B; Leica Microsystems).

## Statistics

All data are expressed as Mean  $\pm$  SE. Differences between groups were analyzed for statistical significance by one-way or two-way ANOVA followed by Bonferroni or Fisher's probable least-squares difference *post hoc* test as appropriate.

## Supporting Information

**Figure S1** SOCS3 mRNA is elevated in soleus muscle of DIO and *ob/ob* mice. Total RNA was isolated from soleus and SOCS3

RNA levels were measured by quantitative real-time RT-PCR. Data are expressed as mean  $\pm$  SE, n=6–8. \*p<0.05. A.U.: arbitrary units.

(TIF)

**Figure S2** General morphology (A) and intramyocellular triacylglycerol (IMTG) content (B) of skeletal muscle from MCK/SOCS3 and control mice. H&E staining and oil red O staining of skeletal muscle were used to determine the general morphology and IMTG, respectively, and were conducted as described in Materials and Methods.

(TIF)

**Figure S3** Quantitation of the western blots of AMPK and ACC phosphorylation. The blots were quantitated with a Li-COR Odyssey Infrared Imager system. Data are expressed as mean  $\pm$  SE. \*p<0.05. A.U.: arbitrary units.

(TIF)

**Figure S4** Body weight development of male MCK/SOCS3 and control mice fed a low fat chow (LF, left panel) or high fat diet (HF, right panel).

(TIF)

**Table S1** Plasma glucose and insulin levels during the hyperinsulinemic-euglycemic clamp period.

(DOC)

## Acknowledgments

We thank Dr. Jeffrey Flier for his permission to use the SOCS3 transgenic mice in this study.

## Author Contributions

Conceived and designed the experiments: HS BX LY ZY. Performed the experiments: ZY RM LC BX HS. Analyzed the data: ZY HS BX MH EK LC. Contributed reagents/materials/analysis tools: EK LC MH RM LY. Wrote the paper: HS BX EK.

## References

- Howard JK, Flier JS (2006) Attenuation of leptin and insulin signaling by SOCS proteins. *Trends Endocrinol Metab* 17: 365–371.
- Ceddia RB (2005) Direct metabolic regulation in skeletal muscle and fat tissue by leptin: implications for glucose and fatty acids homeostasis. *Int J Obes (Lond)* 29: 1175–1183.
- Ferrannini E, Galvan AQ, Gastaldelli A, Camastra S, Sironi AM, et al. (1999) Insulin: new roles for an ancient hormone. *Eur J Clin Invest* 29: 842–852.
- Cline GW, Petersen KF, Krssak M, Shen J, Hundal RS, et al. (1999) Impaired glucose transport as a cause of decreased insulin-stimulated muscle glycogen synthesis in type 2 diabetes. *N Engl J Med* 341: 240–246.
- Kahn BB, Flier JS (2000) Obesity and insulin resistance. *J Clin Invest* 106: 473–481.
- Minokoshi Y, Kim YB, Peroni OD, Fryer LG, Muller C, et al. (2002) Leptin stimulates fatty-acid oxidation by activating AMP-activated protein kinase. *Nature* 415: 339–343.
- Suzuki A, Okamoto S, Lee S, Saito K, Shiuchi T, et al. (2007) Leptin stimulates fatty acid oxidation and peroxisome proliferator-activated receptor alpha gene expression in mouse C2C12 myoblasts by changing the subcellular localization of the alpha2 form of AMP-activated protein kinase. *Mol Cell Biol* 27: 4317–4327.
- Martin TL, Alquier T, Asakura K, Furukawa N, Preitner F, et al. (2006) Diet-induced obesity alters AMP kinase activity in hypothalamus and skeletal muscle. *J Biol Chem* 281: 18933–18941.
- Bjorbaek C, Elmquist JK, Frantz JD, Shoelson SE, Flier JS (1998) Identification of SOCS-3 as a potential mediator of central leptin resistance. *Mol Cell* 1: 619–625.
- Bjorbaek C, El-Haschimi K, Frantz JD, Flier JS (1999) The role of SOCS-3 in leptin signaling and leptin resistance. *J Biol Chem* 274: 30059–30065.
- Emanuelli B, Peraldi P, Filloux C, Sawka-Verhelle D, Hilton D, et al. (2000) SOCS-3 is an insulin-induced negative regulator of insulin signaling. *J Biol Chem* 275: 15985–15991.
- Rui L, Yuan M, Frantz D, Shoelson S, White MF (2002) SOCS-1 and SOCS-3 block insulin signaling by ubiquitin-mediated degradation of IRS1 and IRS2. *J Biol Chem* 277: 42394–42398.
- Shi H, Tzameli I, Bjorbaek C, Flier JS (2004) Suppressor of cytokine signaling 3 is a physiological regulator of adipocyte insulin signaling. *J Biol Chem* 279: 34733–34740.
- Ueki K, Kondo T, Kahn CR (2004) Suppressor of cytokine signaling 1 (SOCS-1) and SOCS-3 cause insulin resistance through inhibition of tyrosine phosphorylation of insulin receptor substrate proteins by discrete mechanisms. *Mol Cell Biol* 24: 5434–5446.
- Shi H, Kokoeva MV, Inouye K, Tzameli I, Yin H, et al. (2006) TLR4 links innate immunity and fatty acid-induced insulin resistance. *J Clin Invest* 116: 3015–3025.
- Zabolotny JM, Kim YB, Welsh LA, Kershaw EE, Neel BG, et al. (2008) Protein-tyrosine phosphatase 1B expression is induced by inflammation in vivo. *J Biol Chem* 283: 14230–14241.
- Husain M, D'Agati VD, He JC, Klotman ME, Klotman PE (2005) HIV-1 Nef induces dedifferentiation of podocytes in vivo: a characteristic feature of HIVAN. *AIDS* 19: 1975–1980.
- Novak A, Guo C, Yang W, Nagy A, Lobe CG (2000) Z/EG, a double reporter mouse line that expresses enhanced green fluorescent protein upon Cre-mediated excision. *Genesis* 28: 147–155.
- Lobe CG, Koop KE, Kreppner W, Lomeli H, Gertsenstein M, et al. (1999) Z/AP, a double reporter for cre-mediated recombination. *Dev Biol* 208: 281–292.

20. Bruning JC, Michael MD, Winnay JN, Hayashi T, Horsch D, et al. (1998) A muscle-specific insulin receptor knockout exhibits features of the metabolic syndrome of NIDDM without altering glucose tolerance. *Mol Cell* 2: 559–569.
21. Xue B, Kahn BB (2006) AMPK integrates nutrient and hormonal signals to regulate food intake and energy balance through effects in the hypothalamus and peripheral tissues. *J Physiol* 574: 73–83.
22. Xue B, Coulter A, Rim JS, Koza RA, Kozak LP (2005) Transcriptional synergy and the regulation of Ucp1 during brown adipocyte induction in white fat depots. *Mol Cell Biol* 25: 8311–8322.
23. Xue B, Rim JS, Hogan JC, Coulter AA, Koza RA, et al. (2007) Genetic variability affects the development of brown adipocytes in white fat but not in interscapular brown fat. *J Lipid Res* 48: 41–51.
24. Kievit P, Howard JK, Badman MK, Balthasar N, Coppari R, et al. (2006) Enhanced leptin sensitivity and improved glucose homeostasis in mice lacking suppressor of cytokine signaling-3 in POMC-expressing cells. *Cell Metab* 4: 123–132.
25. Michael MD, Kulkarni RN, Postic C, Previs SF, Shulman GI, et al. (2000) Loss of insulin signaling in hepatocytes leads to severe insulin resistance and progressive hepatic dysfunction. *Mol Cell* 6: 87–97.
26. Ueki K, Kondo T, Tseng YH, Kahn CR (2004) Central role of suppressors of cytokine signaling proteins in hepatic steatosis, insulin resistance, and the metabolic syndrome in the mouse. *Proc Natl Acad Sci U S A* 101: 10422–10427.
27. Peraldi P, Filloux C, Emanuelli B, Hilton DJ, Van Obberghen E (2001) Insulin induces suppressor of cytokine signaling-3 tyrosine phosphorylation through janus-activated kinase. *J Biol Chem* 276: 24614–24620.
28. Fisher JS, Gao J, Han DH, Holloszy JO, Nolte LA (2002) Activation of AMP kinase enhances sensitivity of muscle glucose transport to insulin. *Am J Physiol Endocrinol Metab* 282: E18–23.
29. Elmquist JK, Maratos-Flier E, Saper CB, Flier JS (1998) Unraveling the central nervous system pathways underlying responses to leptin. *Nat Neurosci* 1: 445–450.
30. Unger RH (2003) Minireview: weapons of lean body mass destruction: the role of ectopic lipids in the metabolic syndrome. *Endocrinology* 144: 5159–5165.
31. Unger RH (2003) Lipid overload and overflow: metabolic trauma and the metabolic syndrome. *Trends Endocrinol Metab* 14: 398–403.
32. Chen G, Koyama K, Yuan X, Lee Y, Zhou YT, et al. (1996) Disappearance of body fat in normal rats induced by adenovirus-mediated leptin gene therapy. *Proc Natl Acad Sci U S A* 93: 14795–14799.
33. Shimabukuro M, Koyama K, Chen G, Wang MY, Trieu F, et al. (1997) Direct antidiabetic effect of leptin through triglyceride depletion of tissues. *Proc Natl Acad Sci U S A* 94: 4637–4641.
34. Park BH, Wang MY, Lee Y, Yu X, Ravazzola M, et al. (2006) Combined leptin actions on adipose tissue and hypothalamus are required to deplete adipocyte fat in lean rats: implications for obesity treatment. *J Biol Chem* 281: 40283–40291.
35. Bjorbaek C, Kahn BB (2004) Leptin signaling in the central nervous system and the periphery. *Recent Prog Horm Res* 59: 305–331.
36. Muoio DM, Dohm GL, Fiedorek FT, Jr., Tapscott EB, Coleman RA (1997) Leptin directly alters lipid partitioning in skeletal muscle. *Diabetes* 46: 1360–1363.
37. Muoio DM, Dohm GL, Tapscott EB, Coleman RA (1999) Leptin opposes insulin's effects on fatty acid partitioning in muscles isolated from obese ob/ob mice. *Am J Physiol* 276: E913–921.
38. Steinberg GR, Dyck DJ (2000) Development of leptin resistance in rat soleus muscle in response to high-fat diets. *Am J Physiol Endocrinol Metab* 279: E1374–1382.
39. Steinberg GR, Parolin ML, Heigenhauser GJ, Dyck DJ (2002) Leptin increases FA oxidation in lean but not obese human skeletal muscle: evidence of peripheral leptin resistance. *Am J Physiol Endocrinol Metab* 283: E187–192.
40. Ramsay TG (2003) Porcine leptin inhibits protein breakdown and stimulates fatty acid oxidation in C2C12 myotubes. *J Anim Sci* 81: 3046–3051.
41. Eguchi M, Gillis LC, Liu Y, Lyakhovskiy N, Du M, et al. (2007) Regulation of SOCS-3 expression by leptin and its co-localization with insulin receptor in rat skeletal muscle cells. *Mol Cell Endocrinol* 267: 38–45.
42. Steinberg GR, McAinch AJ, Chen MB, O'Brien PE, Dixon JB, et al. (2006) The suppressor of cytokine signaling 3 inhibits leptin activation of AMP-kinase in cultured skeletal muscle of obese humans. *J Clin Endocrinol Metab* 91: 3592–3597.
43. O'Neill HM, Holloway GP, Steinberg GR (2012) AMPK regulation of fatty acid metabolism and mitochondrial biogenesis: Implications for obesity. *Mol Cell Endocrinol*.
44. Shi H, Cave B, Inouye K, Bjorbaek C, Flier JS (2006) Overexpression of suppressor of cytokine signaling 3 in adipose tissue causes local but not systemic insulin resistance. *Diabetes* 55: 699–707.
45. Kim JK, Kim YJ, Fillmore JJ, Chen Y, Moore I, et al. (2001) Prevention of fat-induced insulin resistance by salicylate. *J Clin Invest* 108: 437–446.
46. Wang X, Yang Z, Xue B, Shi H (2011) Activation of the cholinergic antiinflammatory pathway ameliorates obesity-induced inflammation and insulin resistance. *Endocrinology* 152: 836–846.
47. Xue B, Pulinilkunnil T, Murano I, Bence KK, He H, et al. (2009) Neuronal PTP1B Deficiency Results in Inhibition of Hypothalamic AMPK and Isoform-Specific Activation of AMPK in Peripheral Tissues. *Mol Cell Biol*.
48. Frisard MI, McMillan RP, Marchand J, Wahlberg K, Wu Y, et al. (2010) Toll-like receptor 4 modulates skeletal muscle substrate metabolism. *Am J Physiol Endocrinol Metab*.
49. Kienesberger PC, Lee D, Pulinilkunnil T, Brenner DS, Cai L, et al. (2009) Adipose triglyceride lipase deficiency causes tissue-specific changes in insulin signaling. *J Biol Chem* 284: 30218–30229.
